# Supplementary material for: Leaf-like hematite-decorated flexible carbon-textile for enhancing mass transfer at triphasic interfaces in photoanodes
Source: Royal Society of Chemistry journal article supplement (doi:10.1039/d5nr00898k), 2025-01-01
Supplement: d5nr00898k1.pdf [file d5nr00898k1.pdf]

## Supporting Information

### Leaf-Like Hematite-Decorated Flexible Carbon-Textile for Enhancing Mass Transfer at Triphasic Interfaces in Photoanodes

*Zhou Zhou<sup>a, #</sup>, Mengmeng Zhu<sup>a, #</sup>, Chengkun Song<sup>a, b, #</sup>, Mingyu Tang<sup>a</sup>, Shujing Li<sup>a</sup>,  
Xiangyu Meng<sup>a, b, \*</sup>, Yueming Sun<sup>a</sup>, Yunqian Dai<sup>a, b, \*</sup>*

<sup>a</sup> School of Chemistry and Chemical Engineering, Southeast University, Nanjing,  
Jiangsu 211189, P. R. China

<sup>b</sup> Purple Mountain Laboratories, Nanjing, Jiangsu 211111, P. R. China

<sup>#</sup> These authors contributed equally to this work.

<sup>\*</sup> Corresponding author: [daiy@seu.edu.cn](mailto:daiy@seu.edu.cn), [xiangyu.meng@seu.edu.cn](mailto:xiangyu.meng@seu.edu.cn)

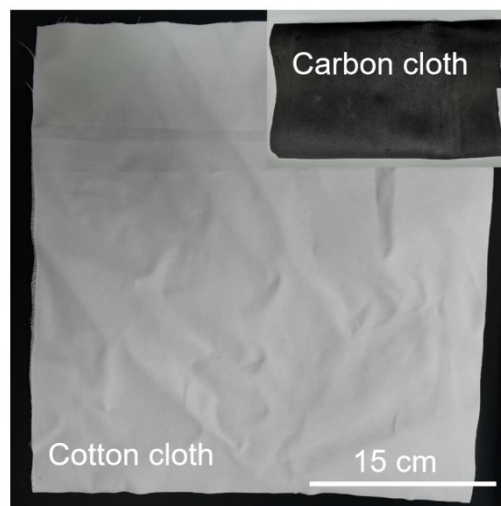

**Fig. S1** Optical images of cotton cloth and carbon cloth.

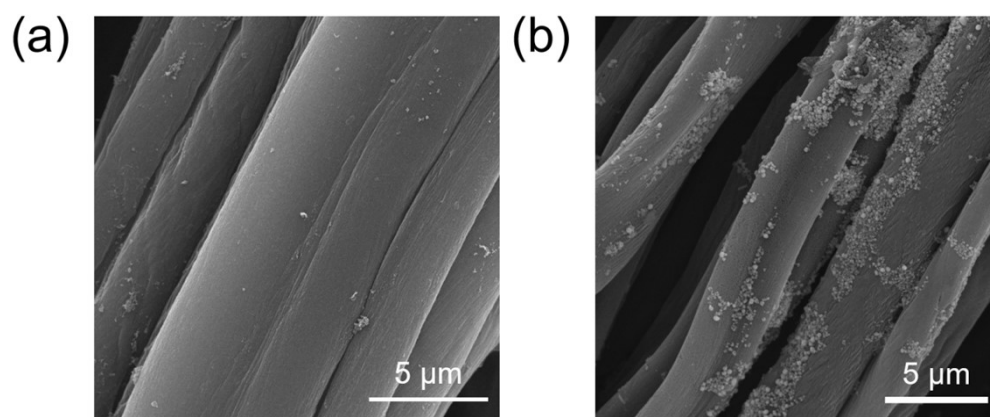

**Fig. S2** SEM of (a) Unoxidized carbon cloth has a smooth surface (b) Unoxidized carbon cloth loaded with  $\alpha$ -Fe<sub>2</sub>O<sub>3</sub>.

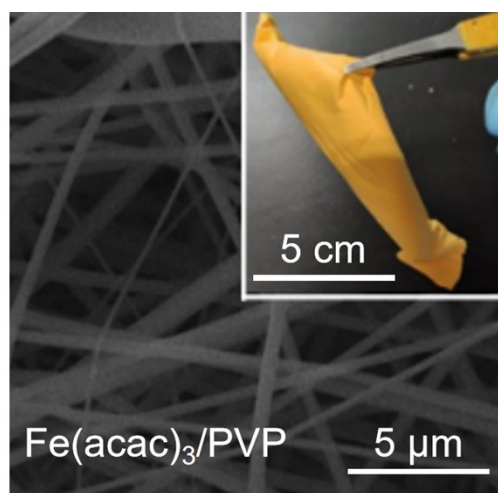

**Fig. S3** SEM image and optical image of Fe(acac)<sub>3</sub>/PVP nanofibers. The inset is the optical image of Fe(acac)<sub>3</sub>/PVP fibrous mat.

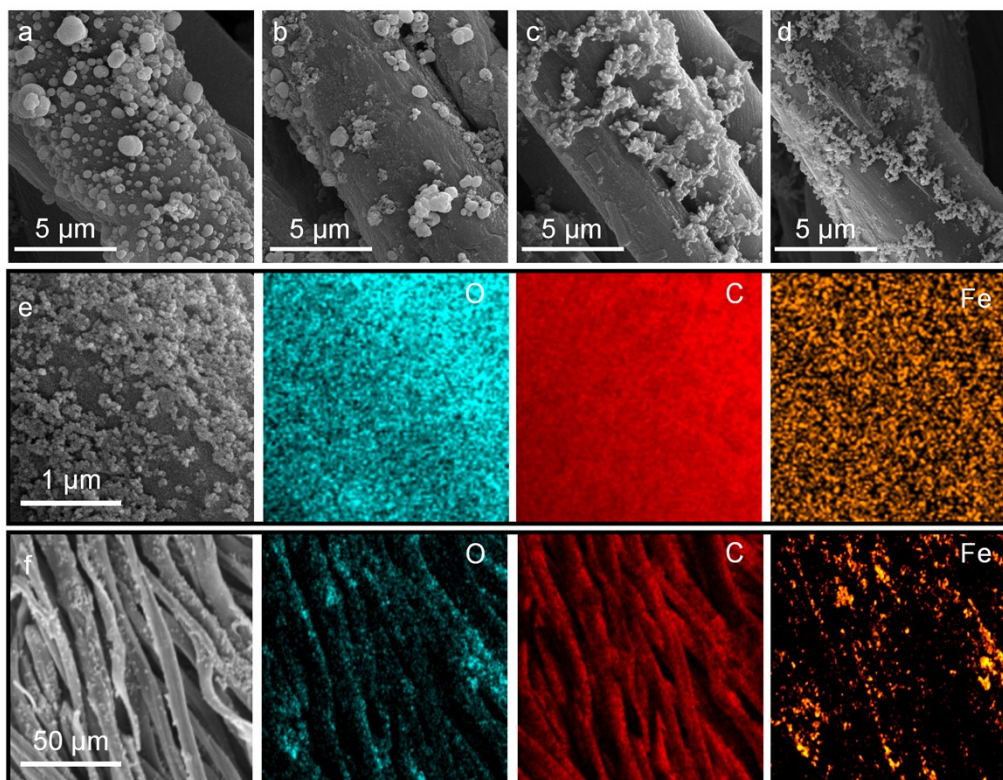

**Fig. S4** (a–d) SEM images of carbon oxide cloth hydrothermally loaded with  $\text{Fe}_2\text{O}_3$  for 2 h, 4 h, 6 h, 8 h. (e, f) The SEM image of  $\alpha\text{-Fe}_2\text{O}_3$ @oxidized carbon cloth-64 is listed in the first column, and the rest is the EDS image of  $\alpha\text{-Fe}_2\text{O}_3$ @oxidized carbon cloth-64.

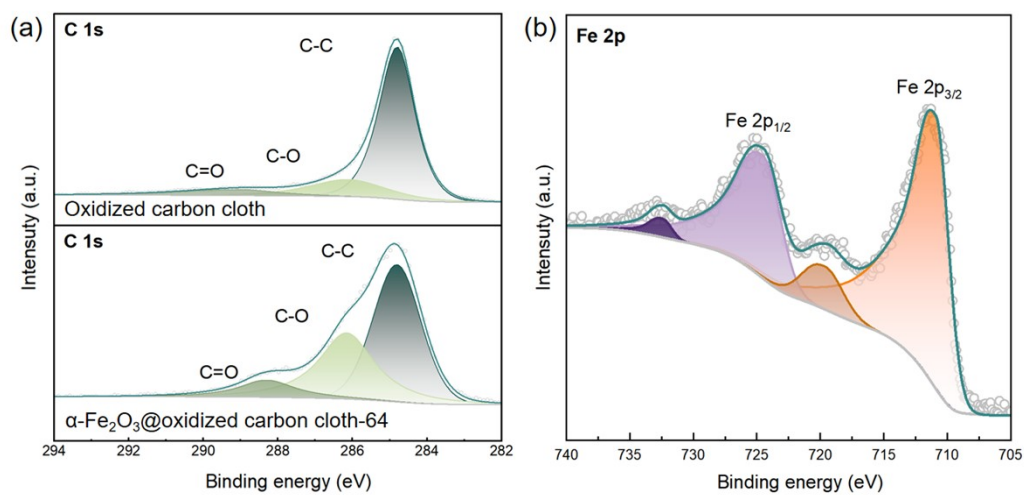

**Fig. S5** XPS spectra of (a) C 1s of oxidized carbon cloth and  $\alpha$ -Fe<sub>2</sub>O<sub>3</sub>@oxidized carbon cloth-64, (b) Fe 2p of  $\alpha$ -Fe<sub>2</sub>O<sub>3</sub>@oxidized carbon cloth-64.

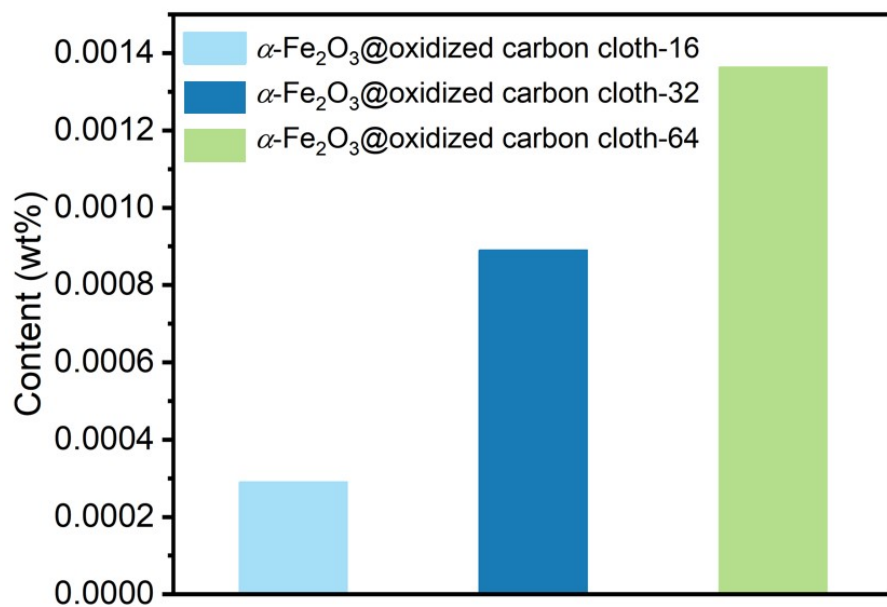

**Fig. S6** ICP-MS of  $\alpha\text{-Fe}_2\text{O}_3\text{@oxidized carbon cloth-16, 32, 64}$ . The ordinate is the content of Fe element per mg of oxidized carbon cloth.

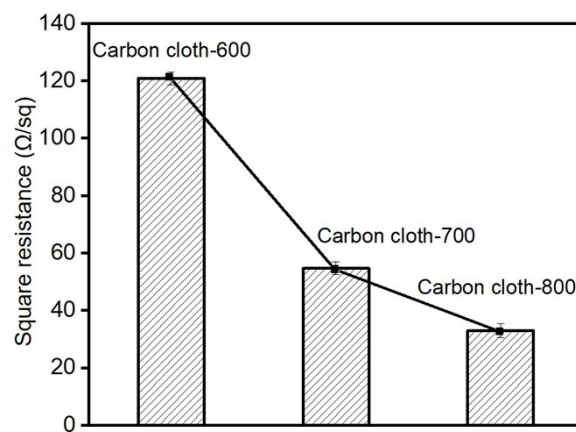

**Fig. S7** Surface resistance of carbon with different carbonization temperatures.



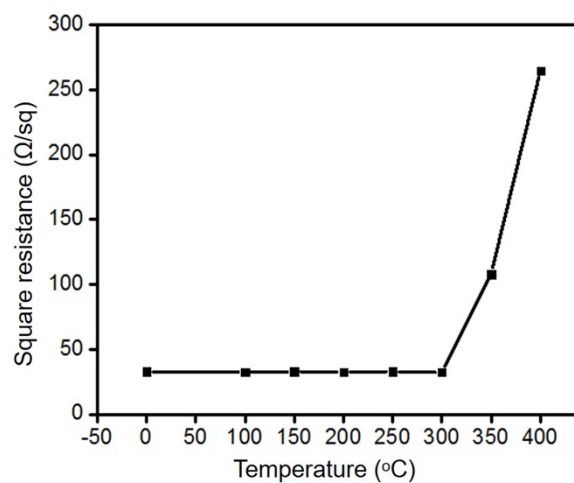

**Fig. S8** The influence of different thermal oxidation temperatures on the resistance of carbon cloth-800.

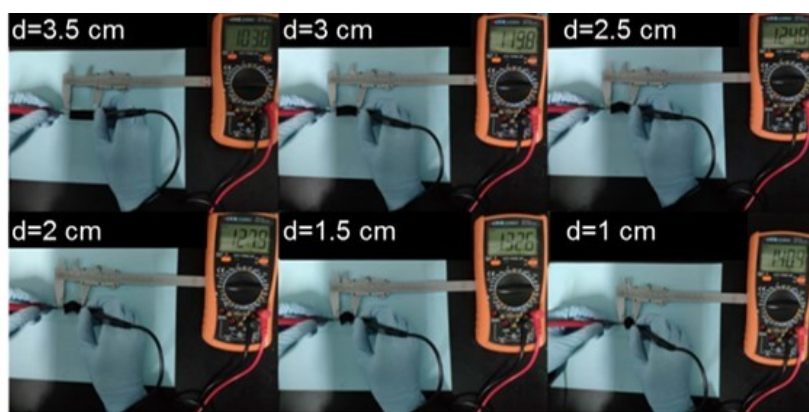

**Fig. S9** The resistance changes of carbon cloth-800 under different curvature deformations.

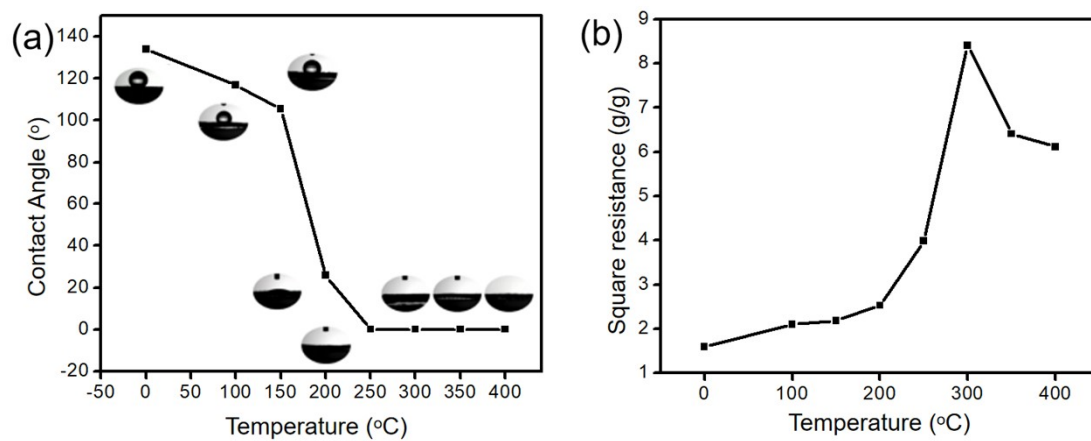

**Fig. S10** The influence of the contact angle (a) and the liquid absorption rate (b) of the carbon cloth-800 surface at different thermal oxidation temperatures.

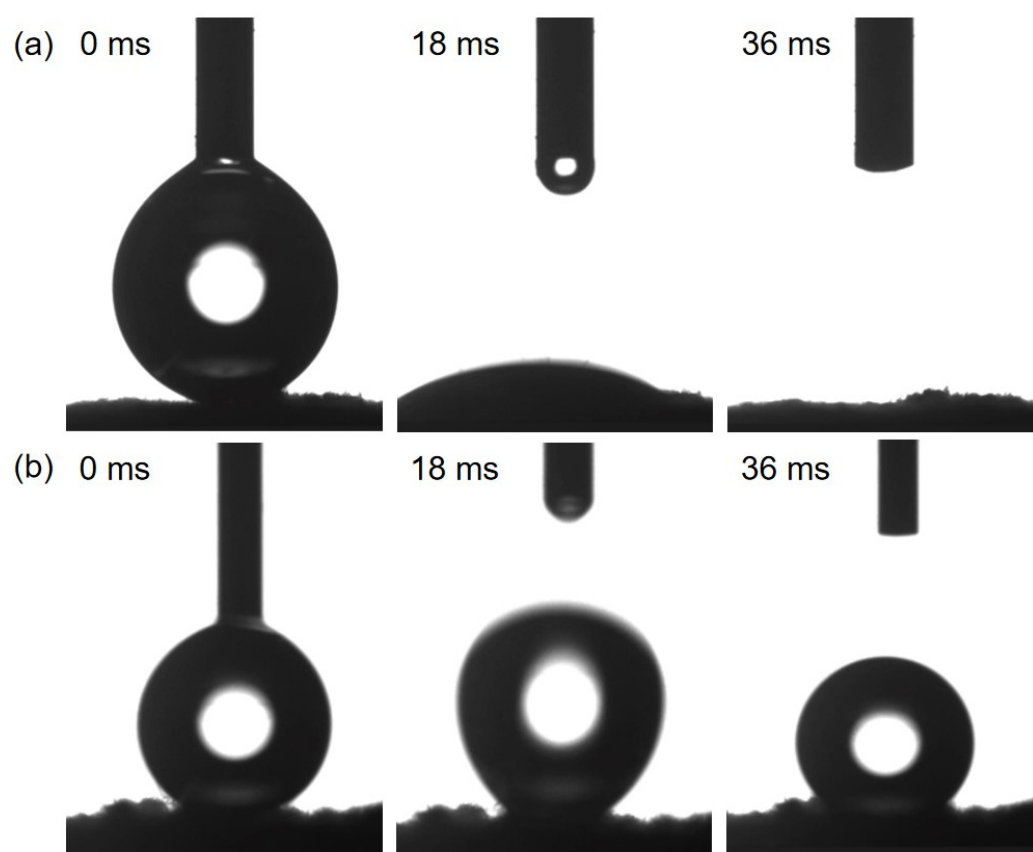

**Fig. S11** Water contact angle of (a) oxidized carbon cloth and (b) carbon cloth.

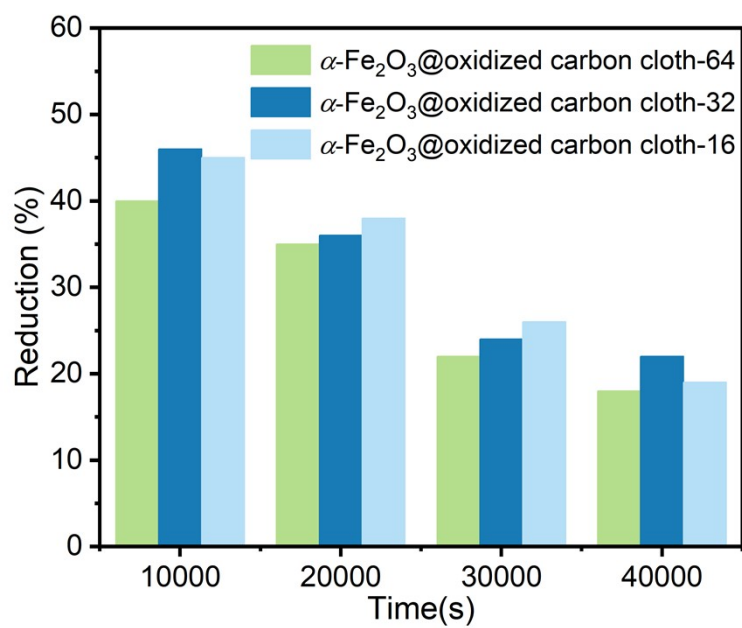

**Fig. S12** The percentage of current reduction per 10000 s of  $\alpha\text{-Fe}_2\text{O}_3$ @oxidized carbon cloth-16, 32, 64.

**Table S1.** The EIS results for  $\alpha$ -Fe<sub>2</sub>O<sub>3</sub>@oxidized carbon cloth-16, 32, 64.

| Materials      | $\alpha$ -Fe <sub>2</sub> O <sub>3</sub> @oxidized<br>carbon cloth-16 | $\alpha$ -Fe <sub>2</sub> O <sub>3</sub> @oxidized<br>carbon cloth-32 | $\alpha$ -Fe <sub>2</sub> O <sub>3</sub> @oxidized<br>carbon cloth-64 |
|----------------|-----------------------------------------------------------------------|-----------------------------------------------------------------------|-----------------------------------------------------------------------|
| CTR1/ $\Omega$ | 89.4                                                                  | 97.3                                                                  | 54.1                                                                  |
| CTR2/ $\Omega$ | 310.3                                                                 | 292                                                                   | 319.4                                                                 |

**Table S2** Comparison of this work with other advanced work.

| Photoelectrode                                                     | Methods                                             | Electrolyte                    | Current density<br>(mA·cm <sup>-2</sup> ) | Overpotential<br>(mV) | Tafel plots<br>(mV·dec <sup>-1</sup> ) | Ref.      |
|--------------------------------------------------------------------|-----------------------------------------------------|--------------------------------|-------------------------------------------|-----------------------|----------------------------------------|-----------|
| $\alpha$ -Fe <sub>2</sub> O <sub>3</sub> @oxidized carbon cloth-64 | Electrospinning, Hydrothermal                       | H <sub>2</sub> SO <sub>4</sub> | 10                                        | 193                   | 42                                     | This work |
| Er-RuO <sub>x</sub>                                                | Electrospinning, Pyrolysis                          | H <sub>2</sub> SO <sub>4</sub> | 10                                        | 200                   | 45                                     | 40        |
| Ir <sup>VI</sup> -ado                                              | Oxidative ligand substitution,<br>Electrodeposition | H <sub>2</sub> SO <sub>4</sub> | 10                                        | 250                   | 32                                     | 41        |
| Ta-RuO <sub>2</sub>                                                | Molten salt method                                  | HClO <sub>4</sub>              | 10                                        | 201                   | 55                                     | 42        |
| Ni(OH) <sub>2</sub> /NF                                            | Electroplating                                      | KOH                            | 10                                        | 200                   | 52.6                                   | 43        |
| CuCo Diatomic Catalysts                                            | Ball-Milling, Pyrolysis                             | KOH                            | 10                                        | 339                   | 45.3                                   | 44        |
| Ir <sub>w</sub> -Co <sub>3</sub> O <sub>4</sub> @NC                | Ir doping via ion exchange, Pyrolysis               | KOH                            | 10                                        | 244                   | 60                                     | 45        |
| LaMnO <sub>3</sub> (LMNO)                                          | Nitridation                                         | KOH                            | 10                                        | 250                   | 54                                     | 46        |
| NiBDC-FeCA                                                         | Solvothermal reaction                               | KOH                            | 10                                        | 280                   | 46.3                                   | 47        |
| Ni <sub>0.75</sub> Fe <sub>0.25</sub> O <sub>x</sub> (001)         | Magnetron sputtering                                | KOH                            | 10                                        | 289                   | 48                                     | 48        |
| NP-(FeCoNi) <sub>2</sub> Nb                                        | Melt-spinning, Chemical dealloying                  | KOH                            | 10                                        | 235                   | 63.6                                   | 49        |
| Ni <sub>2</sub> P-NCDs-Co(OH) <sub>2</sub> -NF-3                   | Immersion                                           | KOH                            | 500                                       | 389                   | 65                                     | 50        |
| CeO <sub>2</sub> /CoS <sub>2</sub> -6                              | Hydrothermal                                        | KOH                            | 10                                        | 283                   | 33.2                                   | 51        |
| Co/CoO <sub>x</sub> /NCNFs-0.1                                     | Electrospinning, Annealing                          | KOH                            | 10                                        | 429                   | 109.4                                  | 52        |
